# Supplementary material
Source: HighWire-hosted journal article supplement (http://molpharm.aspetjournals.org/highwire/filestream/76934/field_highwire_adjunct_files/2/Supplfig3.pdf)
Supplement: Supplfig3.pdf [file Supplfig3.pdf]

## Molecular Pharmacology

### The high affinity cAMP-specific phosphodiesterase 8B (PDE8B) controls steroidogenesis in the mouse adrenal gland

Li-Chun Lisa Tsai, Masami Shimizu-Albergine, and Joseph A. Beavo

#### Supplementary Figure 3

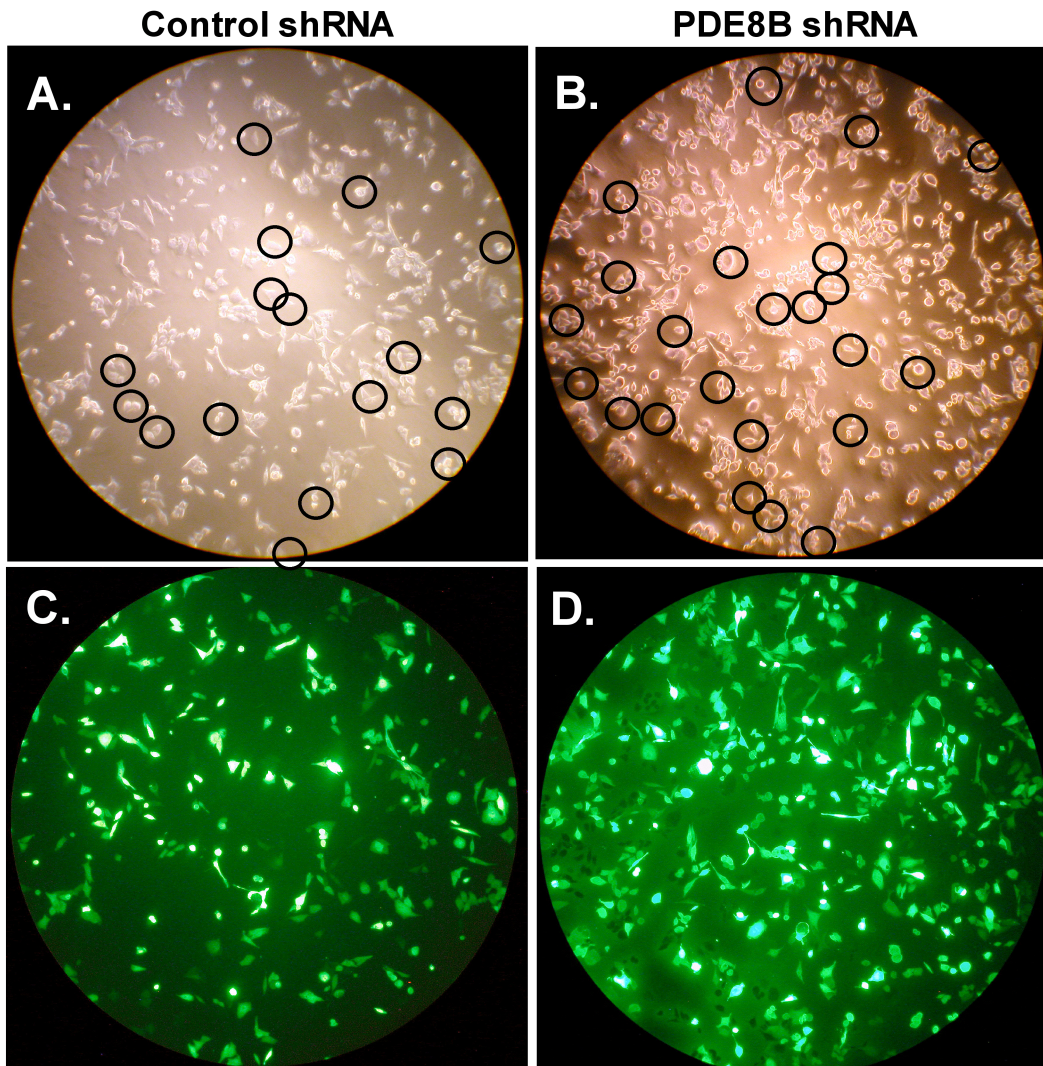

**Figure S3. Transfection efficiency of shRNA plasmids.** Since the shRNA construct used in these studies also containing an GFP expression cassette we were able to detect transfection efficiency. Shown in the upper pannels are brightfield images of Y-1 cells transfected with (A) negative control plasmids and (B) shRNA plasmids. The lower pannels are the fluorescent images of the same fields of Y-1 cells showing uptake of the negative control plasmids (C) and the shRNA plasmids (D). We detected at least three types of cells: highly transfected cells showing in the saturated greenish white color, the modestly transfected green colored cells, and the non-transfected or barely transfected cells are not showing in the fluorescent images (some examples of non-transfected cells are circled in A and B). In both cases, we counted ~70% of the cells were transfected. Suggesting that this shRNA is highly efficient in knocking down PDE8B.
